# Supplementary material
Source: ML conference proceedings conference paper supplement (https://openreview.net/forum?id=i3T0wvQDKg)
Supplement: supplementary_material [file attachment]

Transductive regime mask

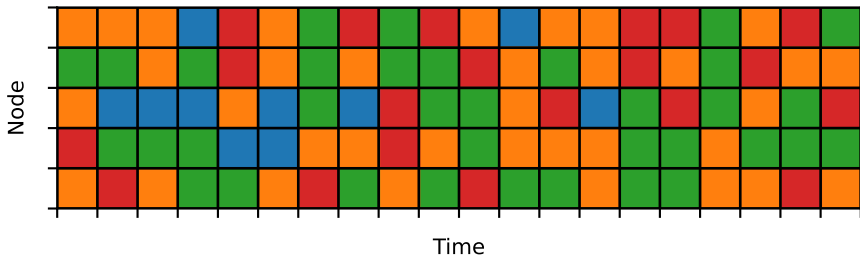

Semi-inductive regime mask

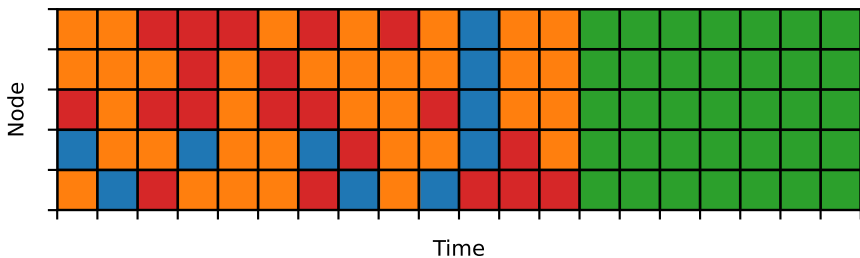

Temporal transductive regime mask

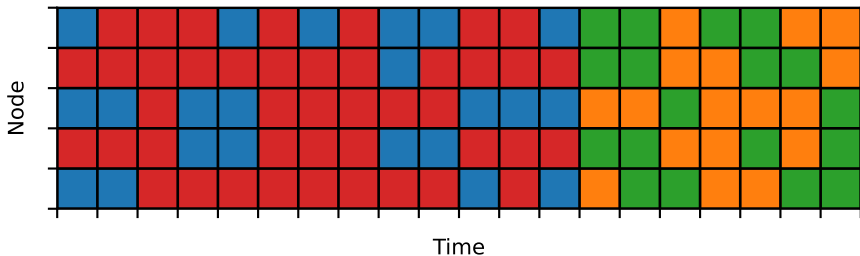

■ Training
 ■ Validation
 ■ Calibration
 ■ Test
