# Supplementary material
Source: ML conference proceedings conference paper supplement (https://openreview.net/forum?id=i3T0wvQDKg)

# GAT Prediction Set Size

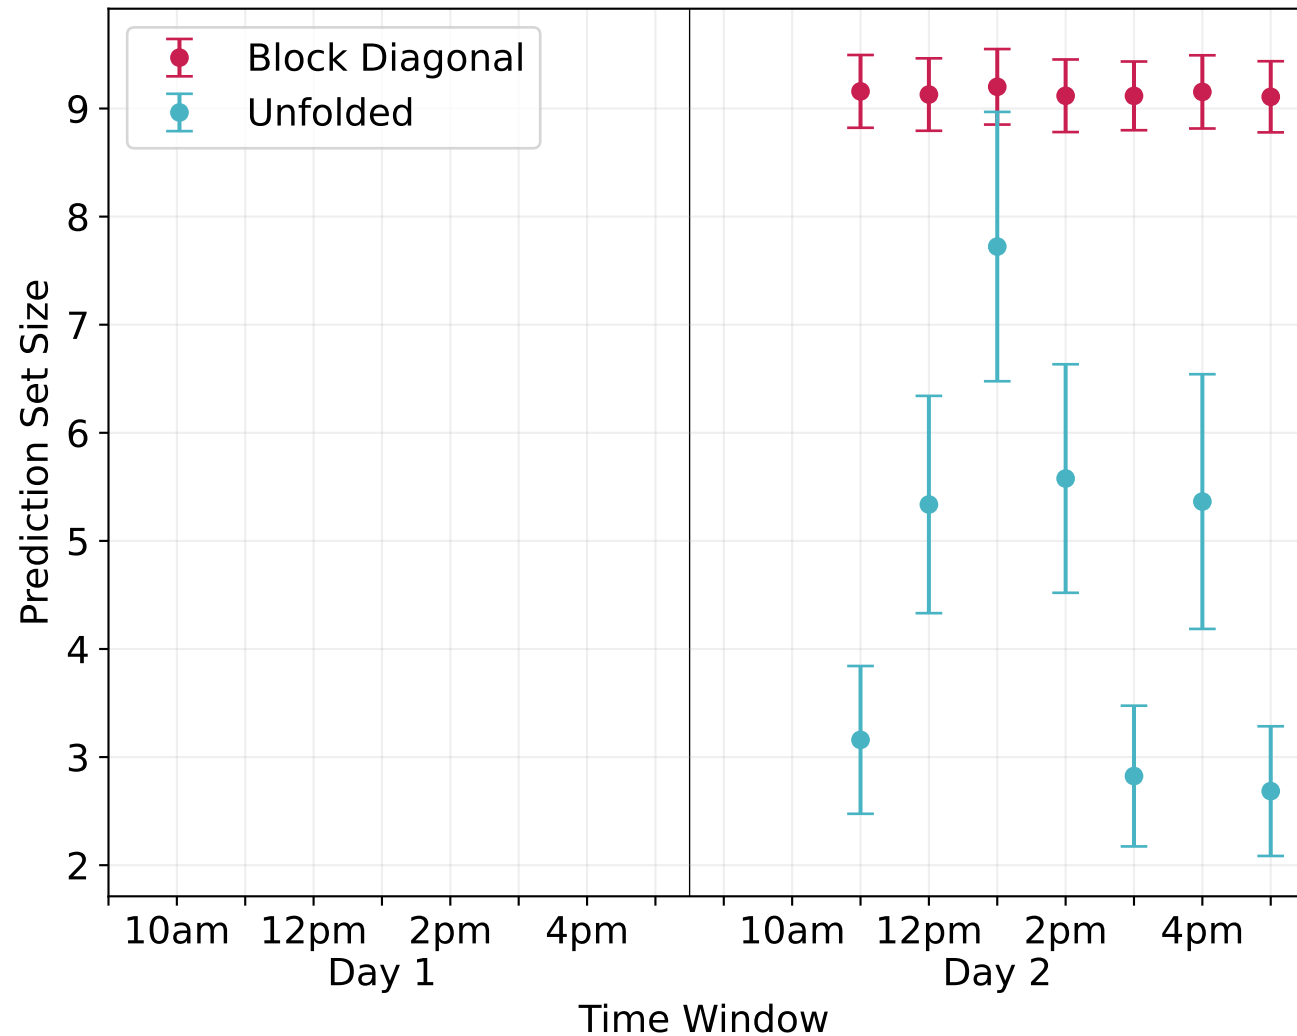

Supplement: supplementary_material [file attachment]

# GAT Accuracy

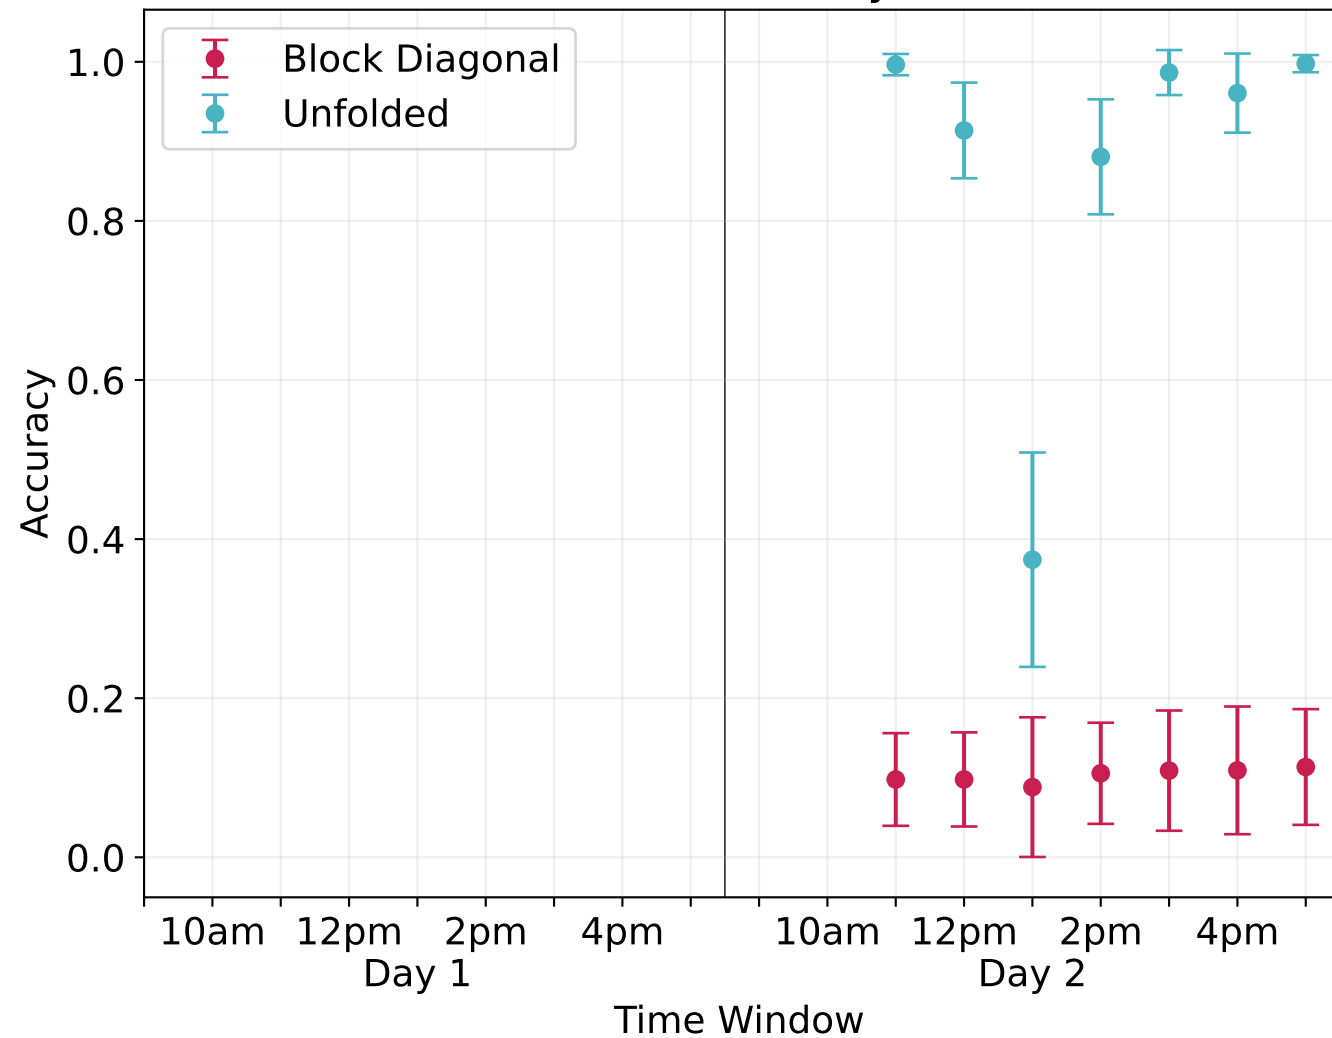

Supplement: supplementary_material [file attachment]

# GCN Accuracy

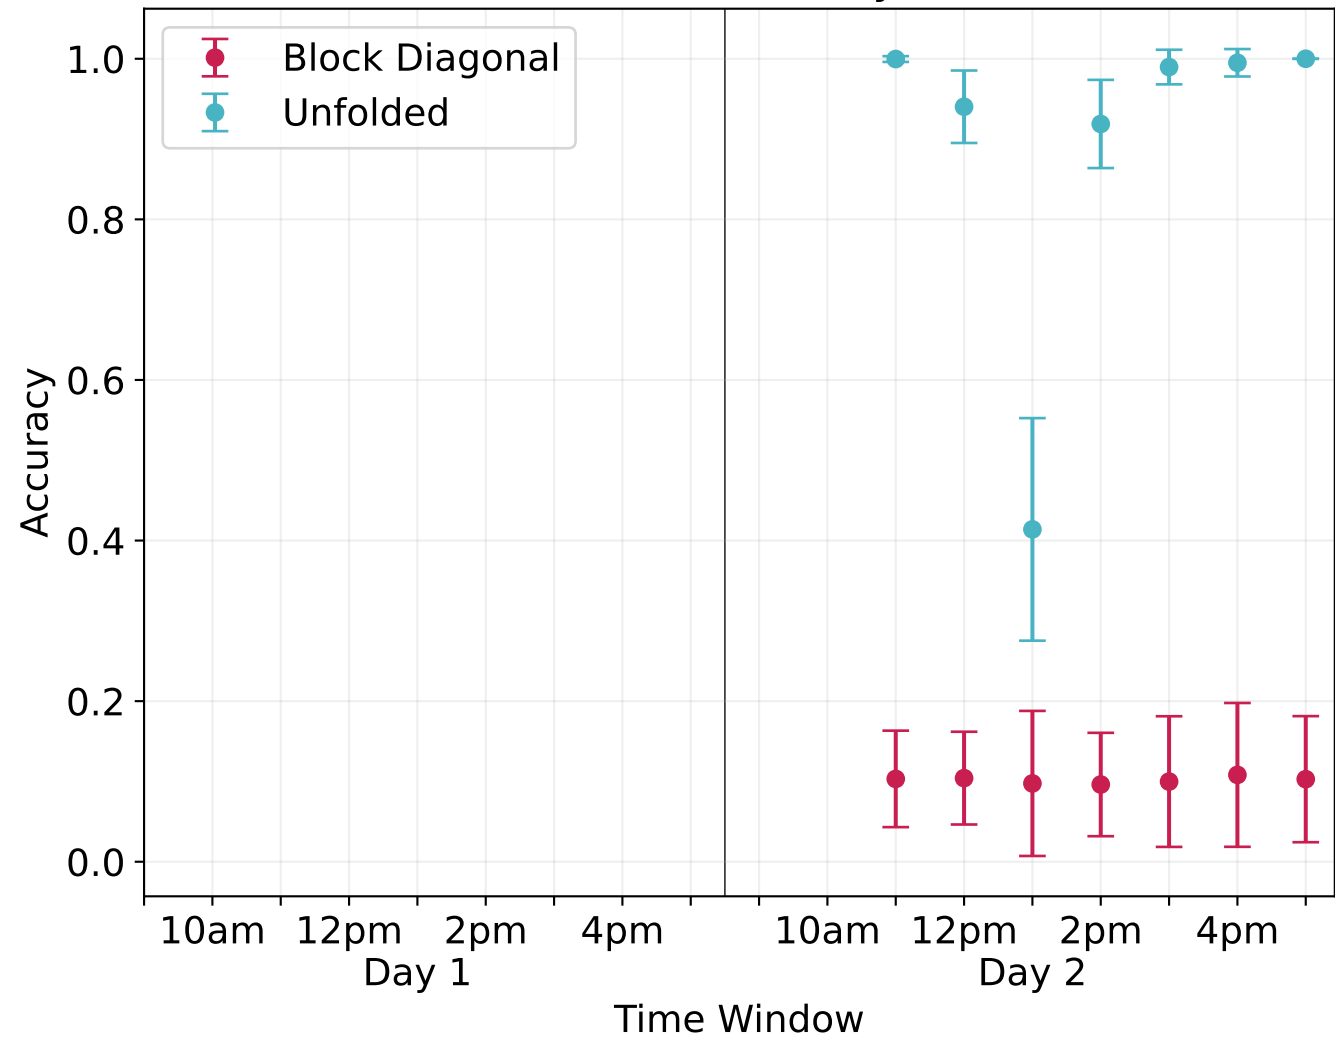

Supplement: supplementary_material [file attachment]

# GAT Coverage

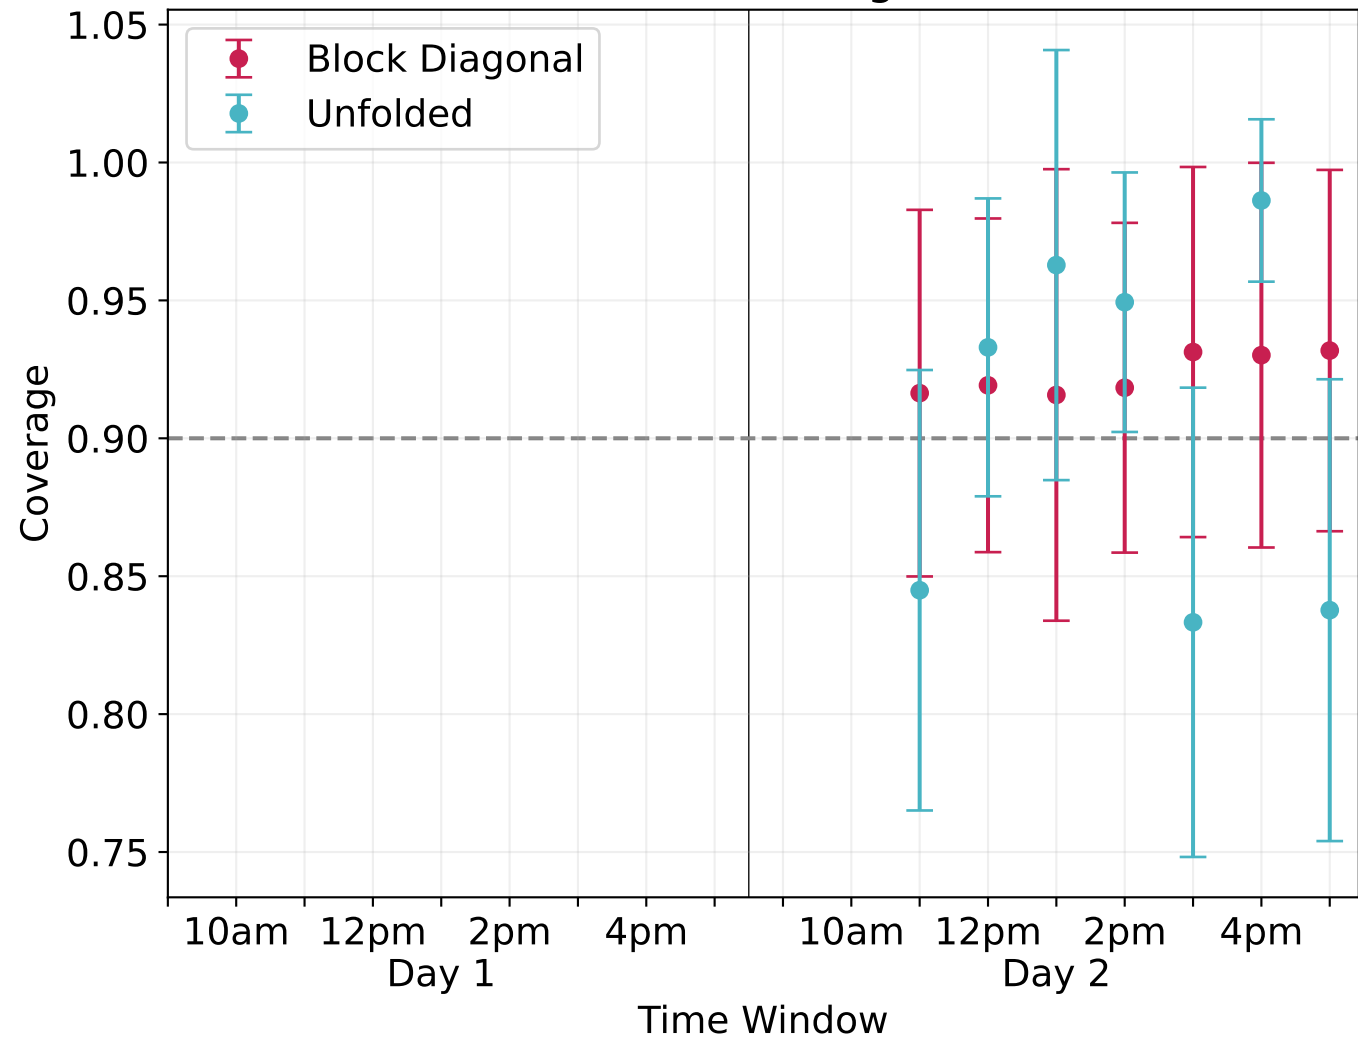

Supplement: supplementary_material [file attachment]

# GCN Prediction Set Size

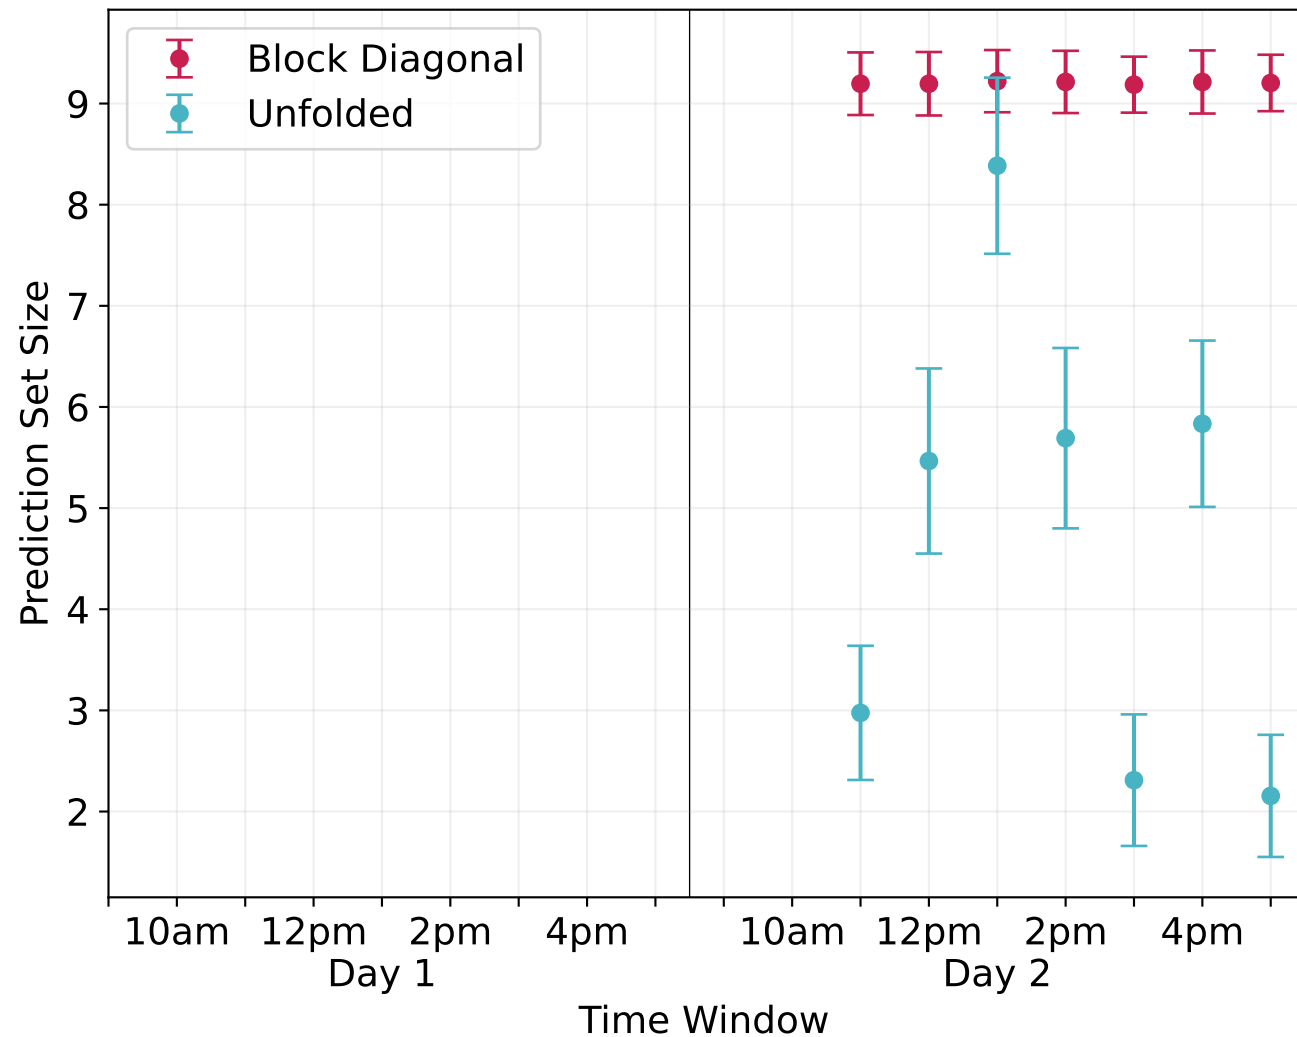

Supplement: supplementary_material [file attachment]

# GCN Coverage

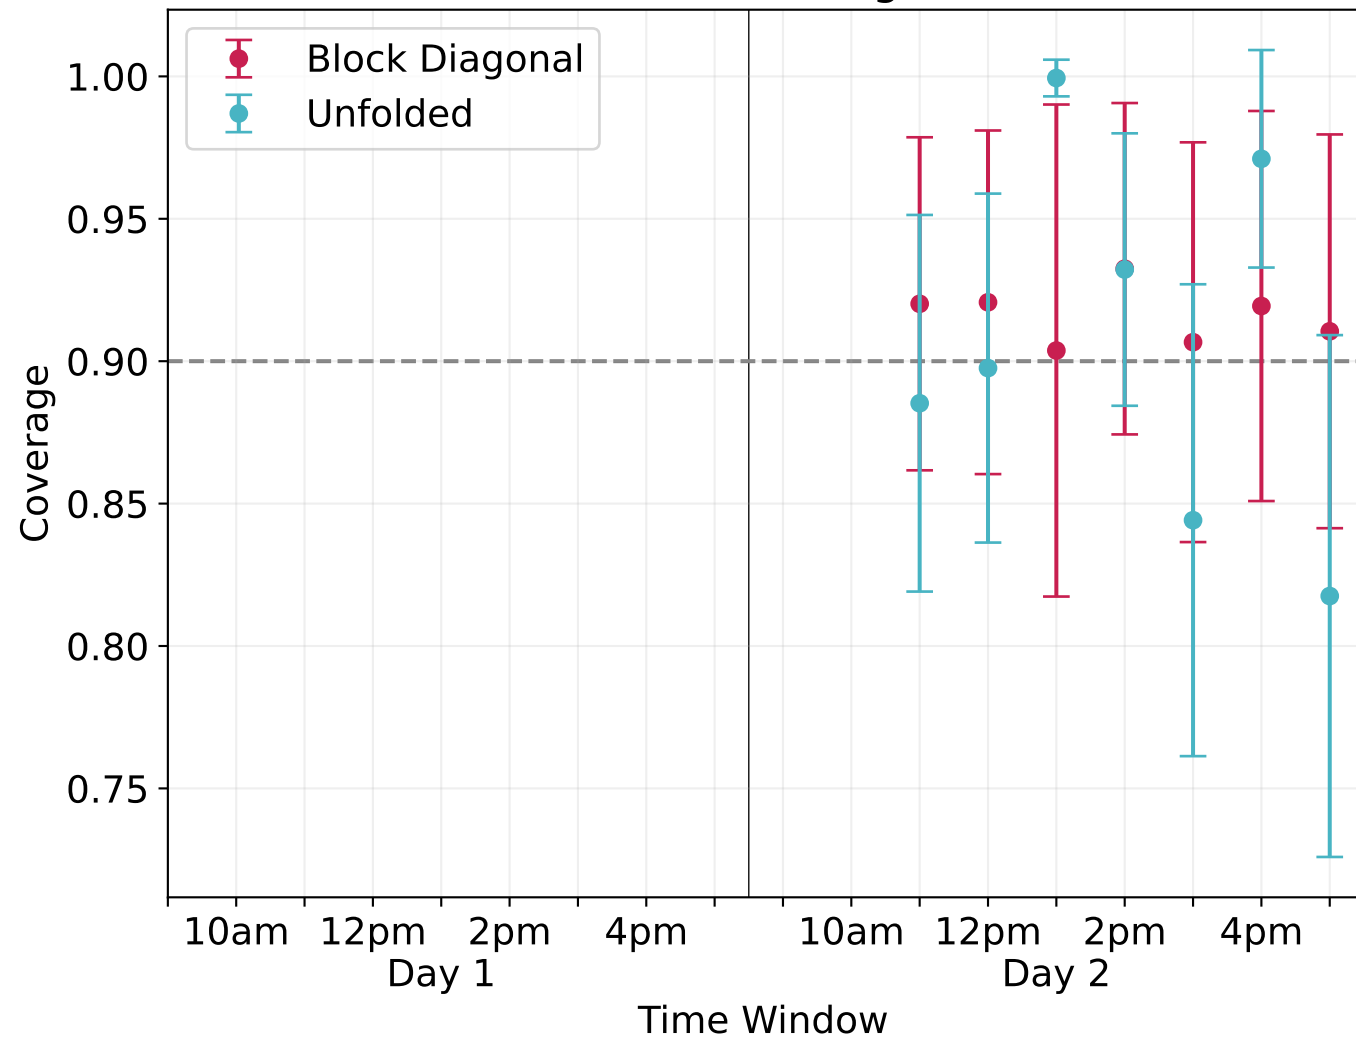

Supplement: supplementary_material [file attachment]
